# Supplementary material for: Gene- and Gender-Related Decrease in Serum BDNF Levels in Alzheimer’s Disease
Source: MDPI journal article supplement (doi:10.3390/ijms232314599), 2022-11-23
Supplement: s1 [file s1]

**Table S1.** APOE allele and genotype frequencies in AD, MCI and controls.

| AD        |     |      | MCI |      | Controls |      |
|-----------|-----|------|-----|------|----------|------|
| genotypes | n   | %    | n   | %    | n        | %    |
| ε3/ε3     | 39  | 49.4 | 17  | 54.8 | 44       | 75.9 |
| ε3/ε4     | 32  | 40.5 | 7   | 22.6 | 5        | 8.6  |
| ε2/ε3     | 2   | 2.5  | 5   | 16.1 | 7        | 12.1 |
| ε2/ε4     | 2   | 2.5  | 2   | 6.5  | 1        | 1.7  |
| ε2/ε2     | 1   | 1.3  | 0   | 0    | 1        | 1.7  |
| ε4/ε4     | 3   | 3.8  | 0   | 0    | 0        | 0    |
| alleles   |     |      |     |      |          |      |
| ε2        | 6   | 3.8  | 7   | 11.3 | 10       | 8.6  |
| ε3        | 112 | 70.9 | 46  | 74.2 | 100      | 86.2 |
| ε4        | 40  | 25.3 | 9   | 14.5 | 6        | 5.2  |

APOE genotype distribution between groups: p=0.001; ε4+ between groups: p<0.001.

**Table S2.** IL-1α-IL-1β-IL-38 estimated haplotypes (f>0.05) in AD, MCI and controls.

| <b>IL-1A-IL-1B-IL-38<br/>haplotypes</b> | AD       |          | MCI      |          | Controls |          |
|-----------------------------------------|----------|----------|----------|----------|----------|----------|
|                                         | <b>n</b> | <b>f</b> | <b>n</b> | <b>f</b> | <b>n</b> | <b>f</b> |
| CCA                                     | 21       | 0.137    | 12       | 0.190    | 19       | 0.167    |
| CCC                                     | 15       | 0.096    | 0        | 0.000    | 5        | 0.040    |
| CTA                                     | 42       | 0.271    | 20       | 0.324    | 41       | 0.354    |
| CTC                                     | 22       | 0.145    | 8        | 0.130    | 18       | 0.155    |
| TCA                                     | 12       | 0.078    | 2        | 0.035    | 5        | 0.043    |
| TTA                                     | 30       | 0.196    | 11       | 0.175    | 14       | 0.117    |
| TTC                                     | 12       | 0.076    | 9        | 0.143    | 14       | 0.124    |

f=haplotype frequency; p=ns.

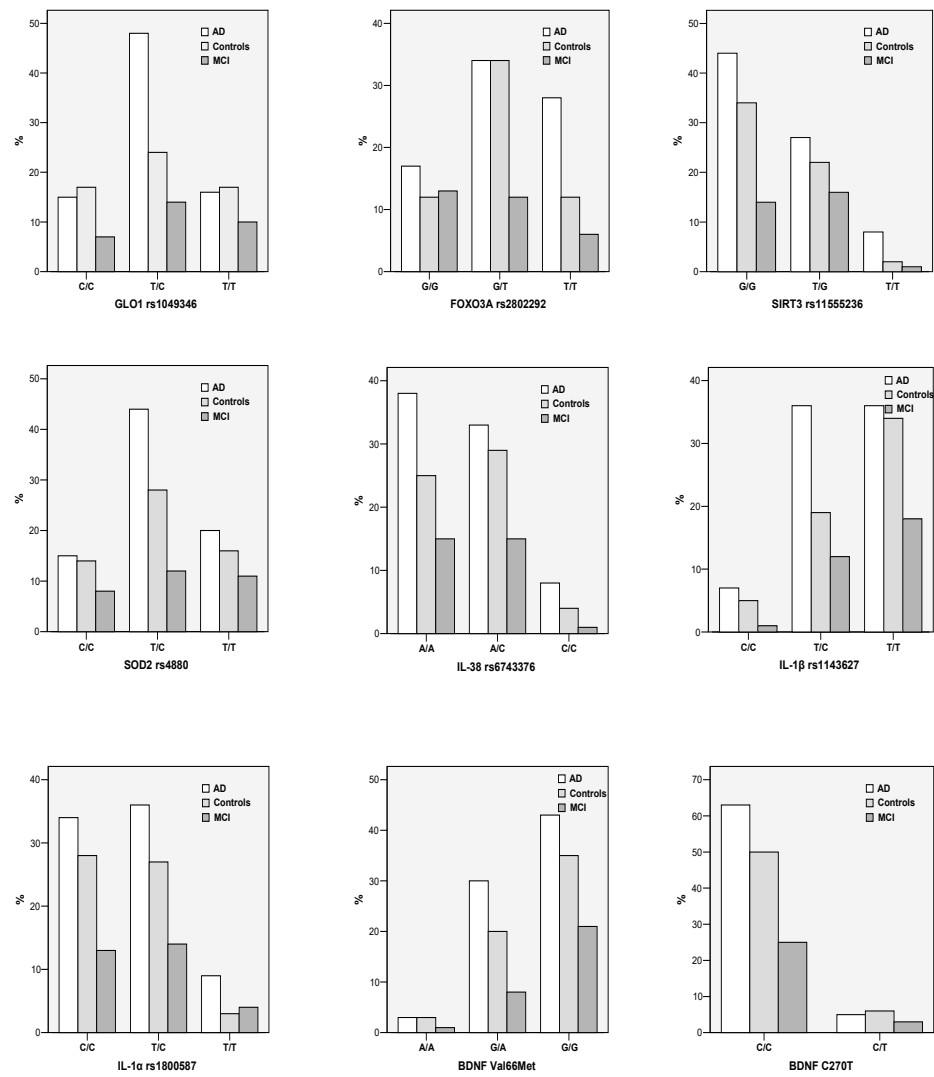

**Figure S1.** Genotype frequencies of the assayed polymorphisms in AD, MCI and controls ( $p=ns$ , Kruskal-Wallis test).
